# Supplementary material for: Complementary effect of co-doping aliovalent elements Bi and Sb in self-compensated SnTe-based thermoelectric materials
Source: Royal Society of Chemistry journal article supplement (doi:10.1039/d1tc01676h), 2021-01-01
Supplement: d1tc01676h1.pdf [file d1tc01676h1.pdf]

## Electronic supplementary information

# Complementary effect of co-doping aliovalent elements Bi and Sb in self-compensated SnTe-based thermoelectric materials

Samuel Kimani Kihoi,<sup>a</sup> U. Sandhya Shenoy,<sup>b</sup> D. Krishna Bhat,<sup>c</sup> and Ho Seong  
Lee<sup>a,\*</sup>

<sup>a</sup> School of Materials Science and Engineering, Kyungpook National University,  
80 Daehak-ro, Buk-gu, Daegu, 41566, Republic of Korea

<sup>b</sup> Department of Chemistry, College of Engineering and Technology, Srinivas  
University, Mukka -574146, Mangalore, Karnataka, India

<sup>c</sup> Department of Chemistry, National Institute of Technology Karnataka,  
Surathkal, Srinivasnagar -575025, Mangalore, Karnataka, India

Table S1 Measured densities for the  $\text{Sn}_{1.03-x-y}\text{Bi}_x\text{Sb}_y\text{Te}$  compositions

| Sample                                                      | Density ( $\text{g}/\text{cm}^3$ ) |
|-------------------------------------------------------------|------------------------------------|
| SnTe                                                        | 6.4239                             |
| $\text{Sn}_{1.03}\text{Te}$                                 | 6.4350                             |
| $\text{SnBi}_{0.03}\text{Te}$                               | 6.4987                             |
| $\text{Sn}_{0.94}\text{Bi}_{0.03}\text{Sb}_{0.06}\text{Te}$ | 6.4624                             |
| $\text{Sn}_{0.92}\text{Bi}_{0.03}\text{Sb}_{0.08}\text{Te}$ | 6.4553                             |
| $\text{Sn}_{0.90}\text{Bi}_{0.03}\text{Sb}_{0.10}\text{Te}$ | 6.4631                             |
| $\text{Sn}_{0.88}\text{Bi}_{0.03}\text{Sb}_{0.12}\text{Te}$ | 6.4660                             |
| $\text{Sn}_{0.86}\text{Bi}_{0.03}\text{Sb}_{0.14}\text{Te}$ | 6.4449                             |

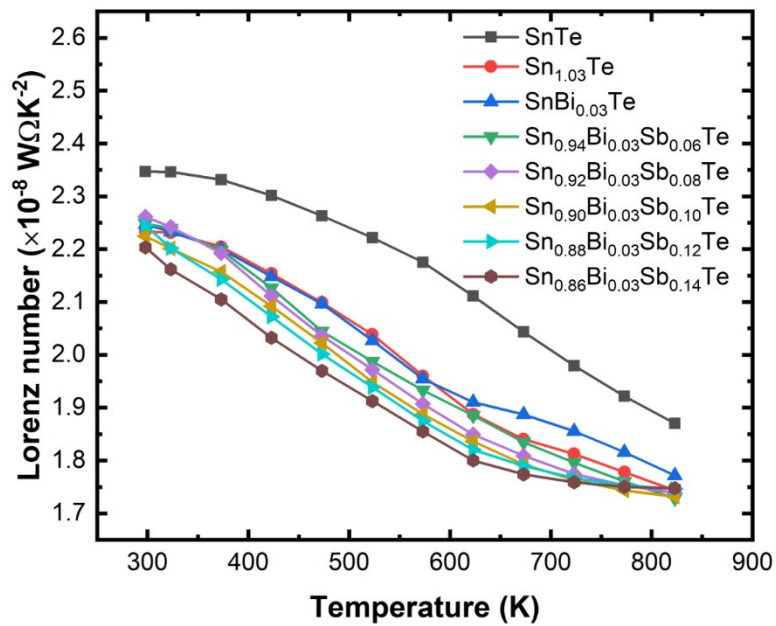

Fig. S1. Temperature dependent Lorenz number for the  $\text{Sn}_{1.03-x-y}\text{Bi}_x\text{Sb}_y\text{Te}$  compositions.

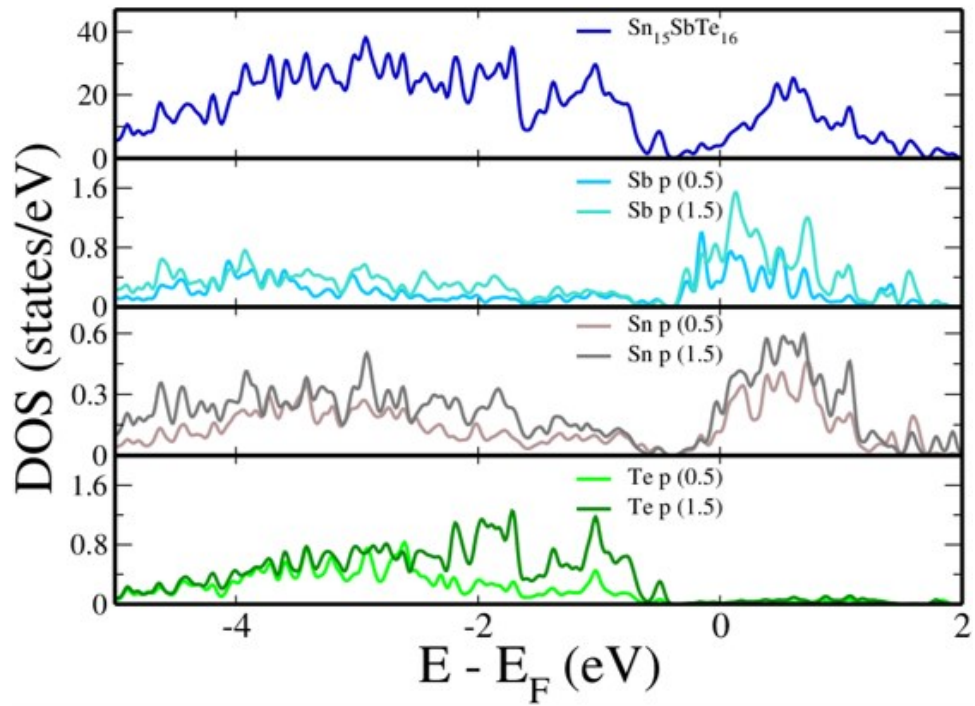

Fig. S2. pDOS of  $\text{Sn}_{15}\text{SbTe}_{16}$ . Energies are shifted with respect to Fermi level which is set to zero. Resonance states appear in the form of increased DOS near the Fermi level.

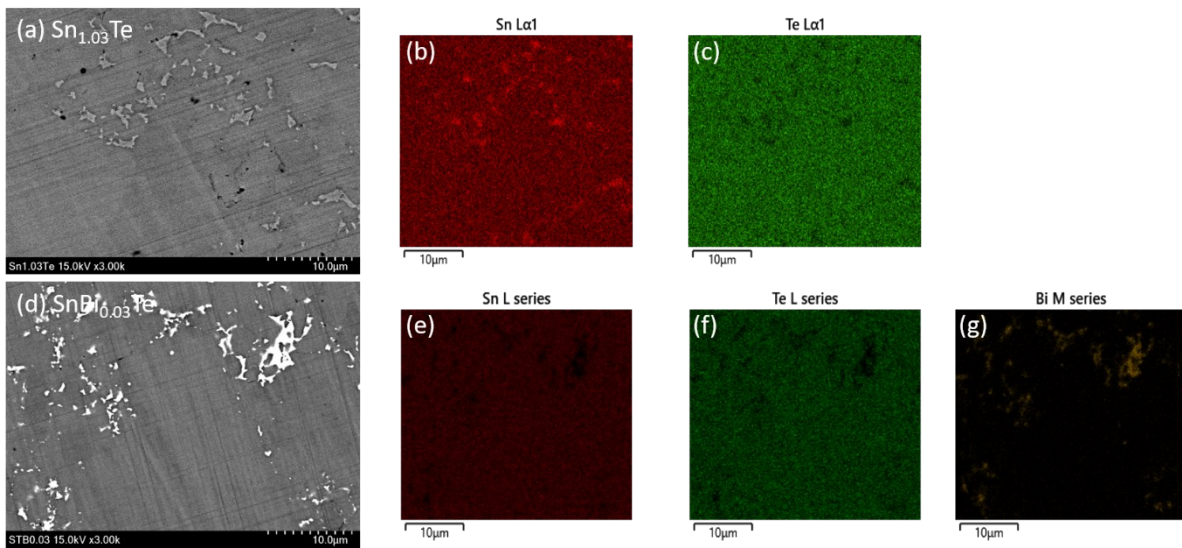

Fig. S3. SEM BSE images for the (a)  $\text{Sn}_{1.03}\text{Te}$  and (d)  $\text{SnBi}_{0.03}\text{Te}$  compositions and respective EDS mapping.

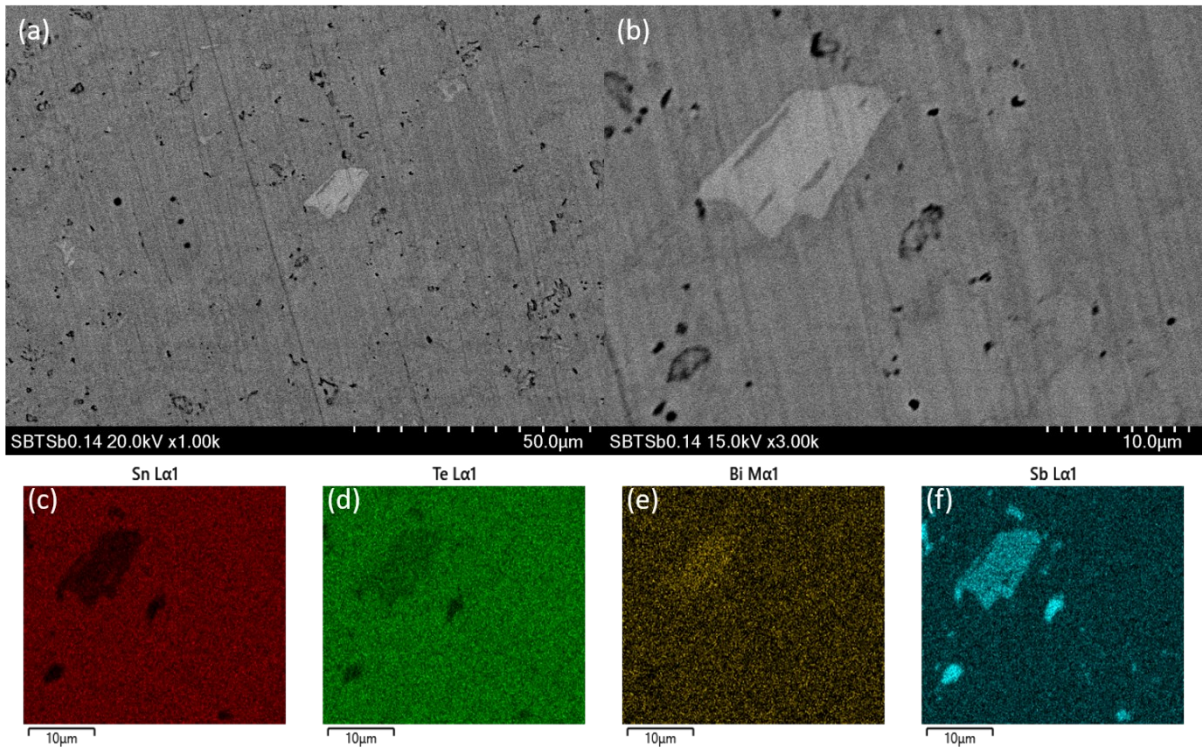

Fig. S4. SEM BSE images for the  $\text{Sn}_{0.86}\text{Bi}_{0.03}\text{Sb}_{0.14}\text{Te}$  composition and respective EDS mapping.

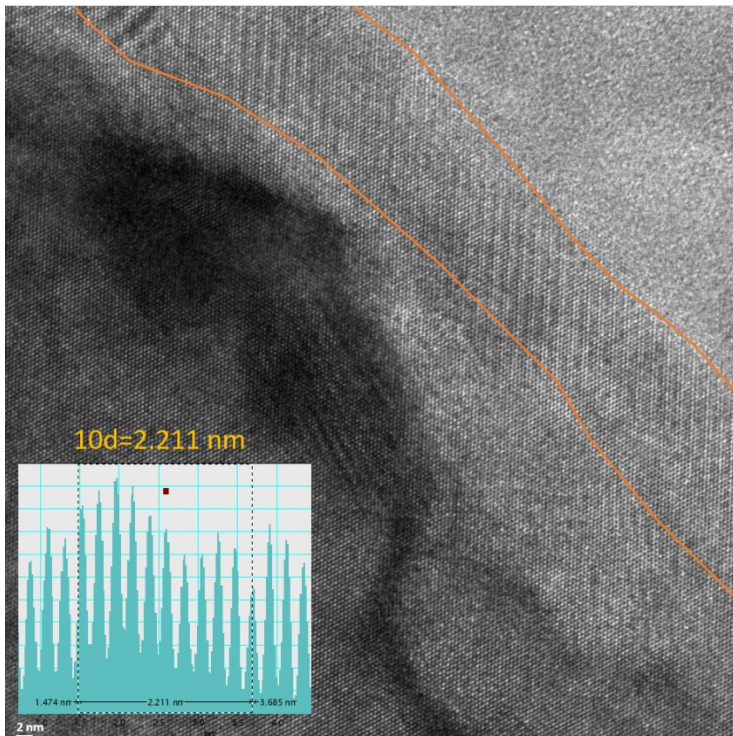

Fig. S5. HRTEM image for the  $\text{Sn}_{0.86}\text{Bi}_{0.03}\text{Sb}_{0.14}\text{Te}$  composition showing lattice spacing for the SnTe (220) plane and a layered structuring bound by the orange lines.

## Lattice parameter calculation

The lattice parameter for all compositions shown in this were extracted from the XRD data.

From Bragg's law:

$$\lambda = 2d\sin\theta \quad (\text{S1})$$

Where  $\lambda$  is the wavelength for the x-ray radiation (1.5406 Å),  $d$  is the inter planar distance and  $\theta$  is the diffraction angle obtained from XRD as  $2\theta/2$ .

For a cubic crystal system:

$$\frac{1}{d^2} = \frac{(h^2 + k^2 + l^2)}{a^2} \quad (\text{S2})$$

Where  $d$  is the previously calculated inter planar distance from XRD data,  $hkl$  are the Miller indices of a diffraction plane and  $a$  is the lattice parameter to be determined.

## Calculation of sound velocity

The plane acoustic longitudinal ( $V_l$ ) and transverse ( $V_t$ ) velocities of all compositions were estimated in the [100], [110], and [111] crystal orientations using elastic constants of SnTe ( $C_{ij}$ )<sup>1</sup> and the measured density ( $\rho$ ) as explained below.<sup>2</sup>

For wave propagating in the [100] direction:

$$V_l = \sqrt{C_{11}/\rho} \quad (\text{S3})$$

$$V_t = \sqrt{C_{44}/\rho} \quad (\text{S4})$$

For wave propagating in the [110] direction:

$$V_l = \sqrt{(C_{11} + C_{12} + C_{44})/2\rho} \quad (\text{S5})$$

$$V_{t1} = \sqrt{(C_{11} - C_{12})/2\rho} \quad (\text{S6})$$

$$V_{t2} = \sqrt{C_{44}/\rho} \quad (\text{S7})$$

For wave propagating in the [111] direction:

$$V_l = \sqrt{(C_{11} + 2C_{12} + 4C_{44})/3\rho} \quad (\text{S8})$$

$$V_t = \sqrt{(C_{11} - C_{12} + C_{44})/3\rho} \quad (\text{S9})$$

A summary of the plane acoustic wave velocities is shown in Table S2.

Table S2 Plane acoustic wave velocities in m/s for the  $\text{Sn}_{1.03-x-y}\text{Bi}_x\text{Sb}_y\text{Te}$  compositions in different crystal orientation directions

| Composition                                                 | [100] |       | [110] |          |          | [111] |       |
|-------------------------------------------------------------|-------|-------|-------|----------|----------|-------|-------|
|                                                             | $V_l$ | $V_t$ | $V_l$ | $V_{tl}$ | $V_{t2}$ | $V_l$ | $V_t$ |
| SnTe                                                        | 4185  | 1351  | 3202  | 2859     | 1351     | 3008  | 2461  |
| $\text{Sn}_{1.03}\text{Te}$                                 | 4181  | 1350  | 3199  | 2856     | 1350     | 3005  | 2459  |
| $\text{SnBi}_{0.03}\text{Te}$                               | 4161  | 1343  | 3183  | 2842     | 1343     | 2991  | 2447  |
| $\text{Sn}_{0.94}\text{Bi}_{0.03}\text{Sb}_{0.06}\text{Te}$ | 4172  | 1347  | 3192  | 2850     | 1347     | 2999  | 2454  |
| $\text{Sn}_{0.92}\text{Bi}_{0.03}\text{Sb}_{0.08}\text{Te}$ | 4175  | 1347  | 3194  | 2852     | 1347     | 3001  | 2455  |
| $\text{Sn}_{0.90}\text{Bi}_{0.03}\text{Sb}_{0.10}\text{Te}$ | 4172  | 1347  | 3192  | 2850     | 1347     | 2999  | 2454  |
| $\text{Sn}_{0.88}\text{Bi}_{0.03}\text{Sb}_{0.12}\text{Te}$ | 4171  | 1346  | 3191  | 2849     | 1346     | 2998  | 2453  |
| $\text{Sn}_{0.86}\text{Bi}_{0.03}\text{Sb}_{0.14}\text{Te}$ | 4178  | 1349  | 3197  | 2854     | 1349     | 3003  | 2457  |

For an isotropic cubic structure, the longitudinal and transverse sound velocities were estimated from the calculated bulk modulus ( $B$ ) and shear modulus ( $G$ ) using the below relations.<sup>2</sup>

$$V_l = \sqrt{(B + 4G/3)/\rho} \quad (\text{S10})$$

$$V_t = \sqrt{G/\rho} \quad (\text{S11})$$

Where both  $B$  and  $G$  are obtained by solving equations S12-15.<sup>2</sup>

$$B = (B_R + B_V)/2 \quad (\text{S12})$$

$$G = (G_R + B_R)/2 \quad (\text{S13})$$

$$B_V = B_R = \frac{1}{3}(C_{11} + 2C_{12}) \quad (\text{S14})$$

$$G_R = \frac{5(C_{11} - C_{12})C_{44}}{4C_{44} + 3(C_{11} - C_{12})} \quad (\text{S15})$$

The average sound velocity,  $V_m$  was then obtained using equation S16.<sup>2,3</sup>

$$V_m = \left[ \frac{1}{3} \left( \frac{2}{V_t^3} + \frac{1}{V_l^3} \right) \right]^{-1/3} \quad (\text{S16})$$

Table S3 Longitudinal, transverse, and average sound velocities in m/s for the  $\text{Sn}_{1.03-x-y}\text{Bi}_x\text{Sb}_y\text{Te}$  compositions

| Composition                                                 | $V_l$ | $V_t$ | $V_m$ |
|-------------------------------------------------------------|-------|-------|-------|
| SnTe                                                        | 3576  | 2152  | 2380  |
| $\text{Sn}_{1.03}\text{Te}$                                 | 3573  | 2150  | 2378  |
| $\text{SnBi}_{0.03}\text{Te}$                               | 3556  | 2140  | 2366  |
| $\text{Sn}_{0.94}\text{Bi}_{0.03}\text{Sb}_{0.06}\text{Te}$ | 3566  | 2146  | 2373  |
| $\text{Sn}_{0.92}\text{Bi}_{0.03}\text{Sb}_{0.08}\text{Te}$ | 3568  | 2147  | 2374  |
| $\text{Sn}_{0.90}\text{Bi}_{0.03}\text{Sb}_{0.10}\text{Te}$ | 3566  | 2146  | 2373  |
| $\text{Sn}_{0.88}\text{Bi}_{0.03}\text{Sb}_{0.12}\text{Te}$ | 3565  | 2145  | 2372  |
| $\text{Sn}_{0.86}\text{Bi}_{0.03}\text{Sb}_{0.14}\text{Te}$ | 3571  | 2149  | 2376  |

## References

- 1 A. G. Beattie, *J. Appl. Phys.*, 1969, **40**, 4818–4821.
- 2 Z. Jia, P. Wang and W. Smith, *Open Phys.*, 2018, **16**, 826–831.
- 3 Z. Chen, Q. Sun, F. Zhang, J. Mao, Y. Chen, M. Li, Z. G. Chen and R. Ang, *Mater. Today Phys.*, 2021, **17**, 100340.
